TOPIC PAGE

# Selfish genetic elements

J. Arvid Ågren <sup>1\*</sup>, Andrew G. Clark <sup>\*</sup>

Department of Molecular Biology and Genetics, Cornell University, Ithaca, NY

<sup>‡</sup> Current address: Department of Organismic and Evolutionary Biology, Harvard University, Cambridge, MA  
<sup>\*</sup> [arvid\\_agren@fas.harvard.edu](mailto:arvid_agren@fas.harvard.edu) (JAÅ); [ac347@cornell.edu](mailto:ac347@cornell.edu) (AGC)

## Abstract

**Selfish genetic elements** (historically also referred to as selfish genes, ultra-selfish genes, selfish DNA, parasitic DNA, genomic outlaws) are genetic segments that can enhance their own transmission at the expense of other genes in the genome, even if this has no or a negative effect on organismal fitness. [1–6] Genomes have traditionally been viewed as cohesive units, with genes acting together to improve the fitness of the organism. However, when genes have some control over their own transmission, the rules can change, and so just like all social groups, genomes are [vulnerable to selfish behaviour by their parts](#). Early observations of selfish genetic elements were made almost a century ago, but the topic did not get widespread attention until several decades later. Inspired by the [gene-centred views of evolution](#) popularized by [George Williams](#)[7] and [Richard Dawkins](#),[8] two papers were published back-to-back in *Nature* in 1980—by [Leslie Orgel](#) and [Francis Crick](#)[9] and [Ford Doolittle](#) and [Carmen Sapienza](#)[10] respectively—introducing the concept of selfish genetic elements (at the time called “selfish DNA”) to the wider scientific community. Both papers emphasized that genes can spread in a population regardless of their effect on organismal fitness as long as they have a transmission advantage. Selfish genetic elements have now been described in most groups of organisms, and they demonstrate a remarkable diversity in the ways by which they promote their own transmission.[11] Though long dismissed as genetic curiosities, with little relevance for evolution, they are now recognized to affect a wide swath of biological processes, ranging from genome size and architecture to speciation.[12]

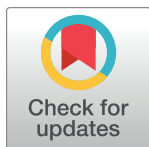

## OPEN ACCESS

**Citation:** Ågren JA, Clark AG (2018) Selfish genetic elements. *PLoS Genet* 14(11): e1007700. <https://doi.org/10.1371/journal.pgen.1007700>

**Published:** November 15, 2018

**Copyright:** © 2018 Ågren, Clark. This is an open access article distributed under the terms of the [Creative Commons Attribution License](#), which permits unrestricted use, distribution, and reproduction in any medium, provided the original author and source are credited.

**Funding:** This research was supported by a fellowship from the Sweden-American Foundation to JAÅ and by funds from NIH R01 GM116113 to R. Wing, M. Long and AGC. The funders had no role in study design, data collection and analysis, decision to publish, or preparation of the manuscript.

**Competing interests:** The authors have declared that no competing interests exist.

This is a Topic Page article for *PLOS Genetics*.

## History

### Early observations

Observations of what we now refer to as selfish genetic elements go back to the early days in the [history of genetics](#). Already in 1928, Russian geneticist Sergey Gershenson reported the discovery of a driving [X chromosome](#) in *Drosophila obscura*. [13] Crucially, he noted that the resulting female-biased sex ratio may drive a population extinct (see [Consequences to the Host](#)

of [Selfish Genetic Elements](#): Species extinction below). The earliest clear statement of how chromosomes may spread in a population not because of their positive fitness effects on the individual organism, but because of their own "parasitic" nature came from the Swedish botanist and cytogeneticist Gunnar Östergren in 1945.[14] Discussing [B chromosomes](#) in plants he wrote:

"In many cases these chromosomes have no useful function at all to the species carrying them, but that they often lead an exclusively parasitic existence . . . [B chromosomes] need not be useful for the plants. They need only be useful to themselves."—Gunnar Östergren[14]

Around the same time, several other examples of selfish genetic elements were reported. For example, the American maize geneticist [Marcus Rhoades](#) described how chromosomal knobs led to female [meiotic drive](#) in maize.[15] Similarly, this was also when it was first suggested that a conflict between [uniparentally inherited](#) mitochondrial genes and biparentally inherited nuclear genes could lead to [cytoplasmic male sterility](#) in plants.[16] Then, in the early 1950s, [Barbara McClintock](#) published a series of papers describing the existence of transposable elements, which are now recognized to be among the most successful selfish genetic elements. [17,18] The discovery of transposable elements led to her being awarded the Nobel Prize in Medicine or Physiology in 1983.

## Conceptual developments

The empirical study of selfish genetic elements benefited greatly from the emergence of the so-called gene's-eye view of evolution in the nineteen sixties and seventies.[19] In contrast with Darwin's original formulation of the theory of evolution by natural selection that focused on individual organisms, the gene's-eye view takes the gene to be the central unit of selection in evolution.[20] It conceives evolution by natural selection as a process involving two separate entities: replicators (entities that produce faithful copies of themselves, usually genes) and vehicles (or interactors; entities that interact with the ecological environment, usually organisms). [21–23] Since organisms are temporary occurrences, present in one generation and gone in the next, genes (replicators) are the only entity faithfully transmitted from parent to offspring. Viewing evolution as a struggle between competing replicators made it easier to recognize that not all genes in an organism would share the same evolutionary fate.

The gene's-eye view was a synthesis of the population genetic models of the modern synthesis, in particular the work of RA Fisher, and the social evolution models of Bill Hamilton. The view was popularized by [George Williams' \*Adaptation and Natural Selection\*](#)[7] and [Richard Dawkins' best seller \*The Selfish Gene\*](#) (Fig 1).[8] Dawkins summarized a key benefit from the gene's-eye view as follows:

"If we allow ourselves the license of talking about genes as if they had conscious aims, always reassuring ourselves that we could translate our sloppy language back into respectable terms if we wanted to, we can ask the question, what is a single selfish gene trying to do?"—Richard Dawkins [The Selfish Gene](#) [8] p. 88

In 1980, two high profile papers published back-to-back in *Nature* by [Leslie Orgel](#) and [Francis Crick](#), and [Ford Doolittle](#) and Carmen Sapienza respectively, brought the study of selfish genetic elements to the centre of biological debate.[9–10] The papers took their starting point in the contemporary debate of the so-called [C-value paradox](#) (see below), the lack of correlation between genome size and perceived complexity of a species. Both papers attempted to counter the prevailing view of the time that the presence of differential amounts of non-coding DNA and transposable elements is best explained from the perspective of individual fitness,

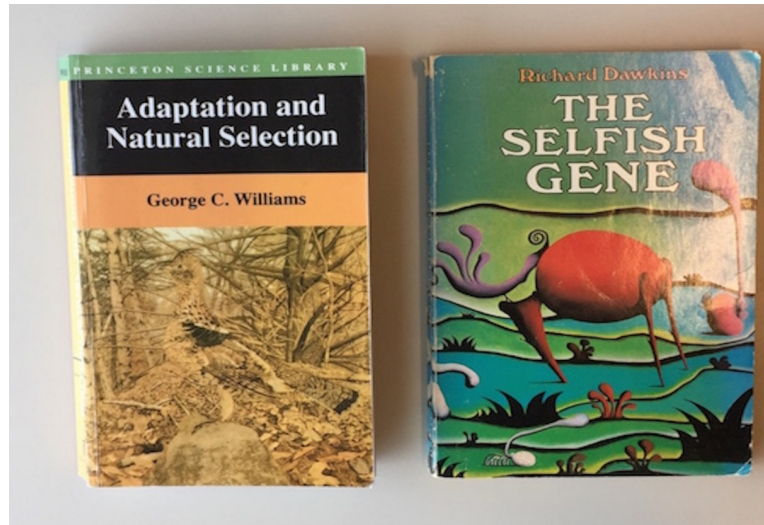

**Fig 1. George Williams' *Adaptation and Natural Selection* (1966) and Richard Dawkins' *The Selfish Gene* (1976) were instrumental in introducing the gene's-eye view to evolutionary biology.**

<https://doi.org/10.1371/journal.pgen.1007700.g001>

described as the "phenotypic paradigm" by Doolittle and Sapienza. Instead, the authors argued that much of the genetic material in eukaryotic genomes persists, not because of its phenotypic effects, but can be understood from a gene's-eye view, without invoking individual-level explanations. The two papers led to a series of exchanges in *Nature*.<sup>[24–27]</sup>

### Current views

If the Selfish DNA papers marked the beginning of the serious study of selfish genetic elements, the subsequent decades have seen an explosion in theoretical advances and empirical discoveries. [Leda Cosmides](#) and [John Tooby](#) wrote a landmark review about the conflict between maternally inherited cytoplasmic genes and biparentally inherited nuclear genes.<sup>[28]</sup> The paper also provided a comprehensive introduction to the logic of genomic conflicts, foreshadowing many themes that would later be subject of much research. Then in 1988, John H. Werren and colleagues wrote the first major empirical review of the topic.<sup>[1]</sup> This paper achieved three things. First, it coined the term selfish genetic element, putting an end to a sometimes confusingly diverse terminology (selfish genes, ultra-selfish genes, selfish DNA, parasitic DNA, genomic outlaws). Second, it formally defined the concept of selfish genetic elements. Finally, it was the first paper to bring together all different kinds of selfish genetic elements known at the time (genomic imprinting, for example, was not covered). In the late 1980s, most molecular biologists considered selfish genetic element to be the exception, and that genomes were best thought of as highly integrated networks with a coherent effect on organismal fitness. In 2006, when Austin Burt and [Robert Trivers](#) published the first book-length treatment of the topic, a comprehensive piece that remains the go-to source on the topic, the tide was changing. While their role in evolution long remained controversial, in a recent review, a century after their first discovery, William R. Rice concluded that "nothing in genetics makes sense except in the light of genomic conflicts".<sup>[29]</sup>

### The logic of selfish genetic elements

Though selfish genetic elements show a remarkable diversity in the way they promote their own transmission, some generalizations about their biology can be made. In a classic 2001

review, Gregory D.D. Hurst and John H. Werren proposed two ‘rules’ of selfish genetic elements.[4]

### **Rule 1: The spread of selfish genetic elements requires sex and outbreeding**

Sexual reproduction involves the mixing of genes from two individuals. According to [Mendel’s Law of Segregation](#), alleles in a sexually reproducing organism have a 50% chance of being passed from parent to offspring. Meiosis is therefore sometimes referred to as “fair”. [30]

Highly self-fertilizing or asexual genomes are expected to experience less conflict between selfish genetic elements and the rest of the host genome than outcrossing sexual genomes.[31–33] There are several reasons for this. First, sex and outcrossing put selfish genetic elements into new genetic lineages. In contrast, in a highly selfing or asexual lineage, any selfish genetic element is essentially stuck in that lineage, which should increase variation in fitness among individuals. The increased variation should result in stronger purifying selection in selfers/ asexuals, as a lineage without the selfish genetic elements should out-compete a lineage with the selfish genetic element. Second, the increased homozygosity in selfers removes the opportunity for competition among homologous alleles. Third, theoretical work has shown that the greater linkage disequilibrium in selfing compared to outcrossing genomes may in some, albeit rather limited, cases cause selection for reduced transposition rates.[34] Overall, this reasoning leads to the prediction that asexuals/selfers should experience a lower load of selfish genetic elements. One caveat to this is that the evolution of selfing is associated with a reduction in the [effective population size](#). [35] A reduction in the effective population size should reduce the efficacy of selection and therefore leads to the opposite prediction: higher accumulation of selfish genetic elements in selfers relative to outcrossers. Empirical evidence for the importance of sex and outcrossing comes from a variety of selfish genetic elements, including transposable elements,[36,37] self-promoting plasmids,[38] and B chromosomes.[39]

### **Rule 2: The presence of selfish genetic elements is often revealed in hybrids**

The presence of selfish genetic elements can be difficult to detect in natural populations. Instead, their phenotypic consequences often become apparent in hybrids. The first reasons for this is that some selfish genetic elements rapidly sweep to fixation, and the phenotypic effects will therefore not be segregating in the population. Hybridization events, however, will produce offspring with and without the selfish genetic elements and so reveal their presence. The second reason is that host genomes have evolved mechanisms to suppress the activity of the selfish genetic elements, for example the small RNA administered silencing of transposable elements.[40] The co-evolution between selfish genetic elements and their suppressors can be rapid, and follow a [Red Queen dynamics](#), which may mask the presence of selfish genetic elements in a population. Hybrid offspring, on the other hand, may inherit a given selfish genetic element, but not the corresponding suppressor and so reveal the phenotypic effect of the selfish genetic element.[41,42]

## **Examples of selfish genetic elements**

### **Segregation distorters**

Some selfish genetic elements manipulate the genetic transmission process to their own advantage, and so end up being overrepresented in the gametes ([Fig 2](#)). Such distortion can occur in various ways, and the umbrella term that encompasses all of them is segregation distortion. Some elements can preferentially be transmitted in egg cells as opposed to polar bodies during meiosis, where only the former will be fertilized and transmitted to the next generation. Any

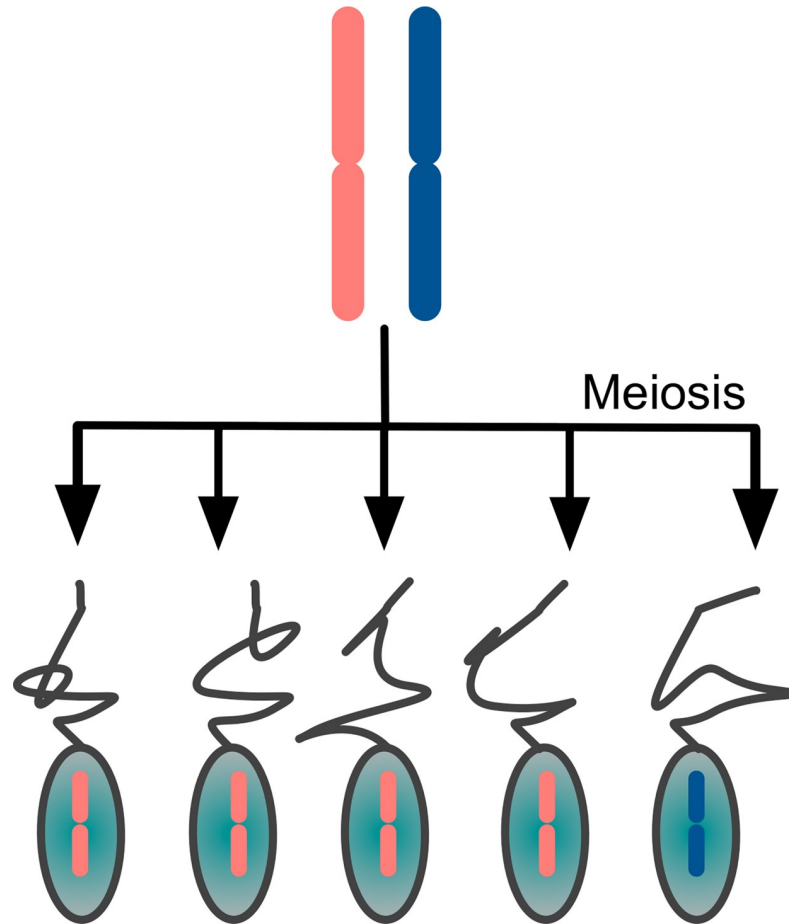

**Fig 2. Segregation distorters (here shown in red) get transmitted to >50% of the gametes.**

<https://doi.org/10.1371/journal.pgen.1007700.g002>

gene that can manipulate the odds of ending up in the egg rather than the polar body will have a transmission advantage, and will increase in frequency in a population.

Segregation distortion can happen in several ways. When this process occurs during meiosis it is referred to as meiotic drive. Many forms of segregation distortion occur in male gamete formation, where there is differential mortality of spermatids during the process of sperm maturation or spermiogenesis. The Segregation Distorter (SD) in *Drosophila melanogaster* is the best studied example, and it involves a nuclear envelope protein Ran-GAP and the X-linked repeat array called Responder (Rsp), where the SD allele of Ran-GAP favors its own transmission only in the presence of a Rsp-sensitive allele on the homologous chromosome.[43–48] SD acts to kill RSP<sup>sensitive</sup> sperm, in a post-meiotic process (hence it is not strictly speaking meiotic drive). Systems like this can have interesting rock-paper-scissors dynamics, oscillating between the SD-RSP<sup>insensitive</sup>, SD+-RSP<sup>insensitive</sup> and SD+-RSP<sup>sensitive</sup> haplotypes. The SD-RSP<sup>sensitive</sup> haplotype is not seen because it essentially commits suicide.

When segregation distortion acts on sex chromosomes, they can skew the sex ratio. The SR system in *Drosophila pseudoobscura*, for example, is on the X chromosome, and X<sup>SR</sup>/Y males produce only daughters, whereas females undergo normal meiosis with Mendelian proportions of gametes.[49,50] Segregation distortion systems would drive the favored allele to fixation, except that most of the cases where these systems have been identified have the driven

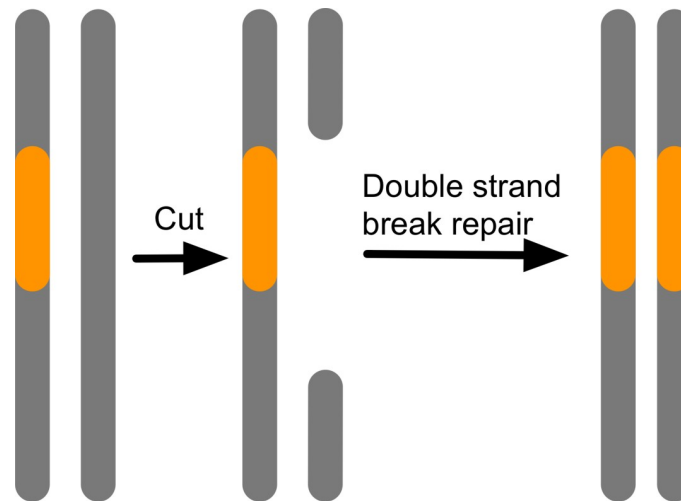

**Fig 3. Homing endonucleases can recognize a target sequence, cut it, and then use its own sequence as a template during double strand break repair. This converts a heterozygote into a homozygote.**

<https://doi.org/10.1371/journal.pgen.1007700.g003>

allele opposed by some other selective force. One example is the lethality of the t-haplotype in mice,[51] another is the effect on male fertility of the Sex Ratio system in *D. pseudoobscura*. [49]

### Homing endonucleases

A phenomenon closely related to segregation distortion is homing endonucleases.[52–54] These are enzymes that cut DNA in a sequence-specific way, and those cuts, generally double-strand breaks, are then “healed” by the regular DNA repair machinery. Homing endonucleases insert themselves into the genome at the site homologous to the first insertion site, resulting in a conversion of a heterozygote into a homozygote bearing a copy of the homing endonuclease on both homologous chromosomes (Fig 3). This gives homing endonucleases an allele frequency dynamics rather similar to a segregation distortion system, and generally unless opposed by strong countervailing selection, they are expected to go to fixation in a population. CRISPR-Cas9 technology allows the artificial construction of homing endonuclease systems. These so-called “gene drive” systems pose a combination of great promise for biocontrol but also potential risk[55,56] (see below).

### Transposable elements

Transposable elements (TEs) include a wide variety of DNA sequences that all have the ability to move to new locations in the genome of their host. Transposons do this by a direct cut-and-paste mechanism, whereas retrotransposons need to produce an RNA intermediate to move. TEs were first discovered in maize by [Barbara McClintock](#) in the 1940s[17] and their ability to occur in both active and quiescent states in the genome was also first elucidated by McClintock.[57] TEs have been referred to as selfish genetic elements because they have some control over their own propagation in the genome (Fig 4). Most random insertions into the genome appear to be relatively innocuous, but they can disrupt critical gene functions with devastating results.[58] For example, TEs have been linked to a variety of human diseases, ranging from cancer to haemophilia.[59] TEs that tend to avoid disrupting vital functions in the genome tend to remain in the genome longer, and hence we are more likely to find them in innocuous locations.

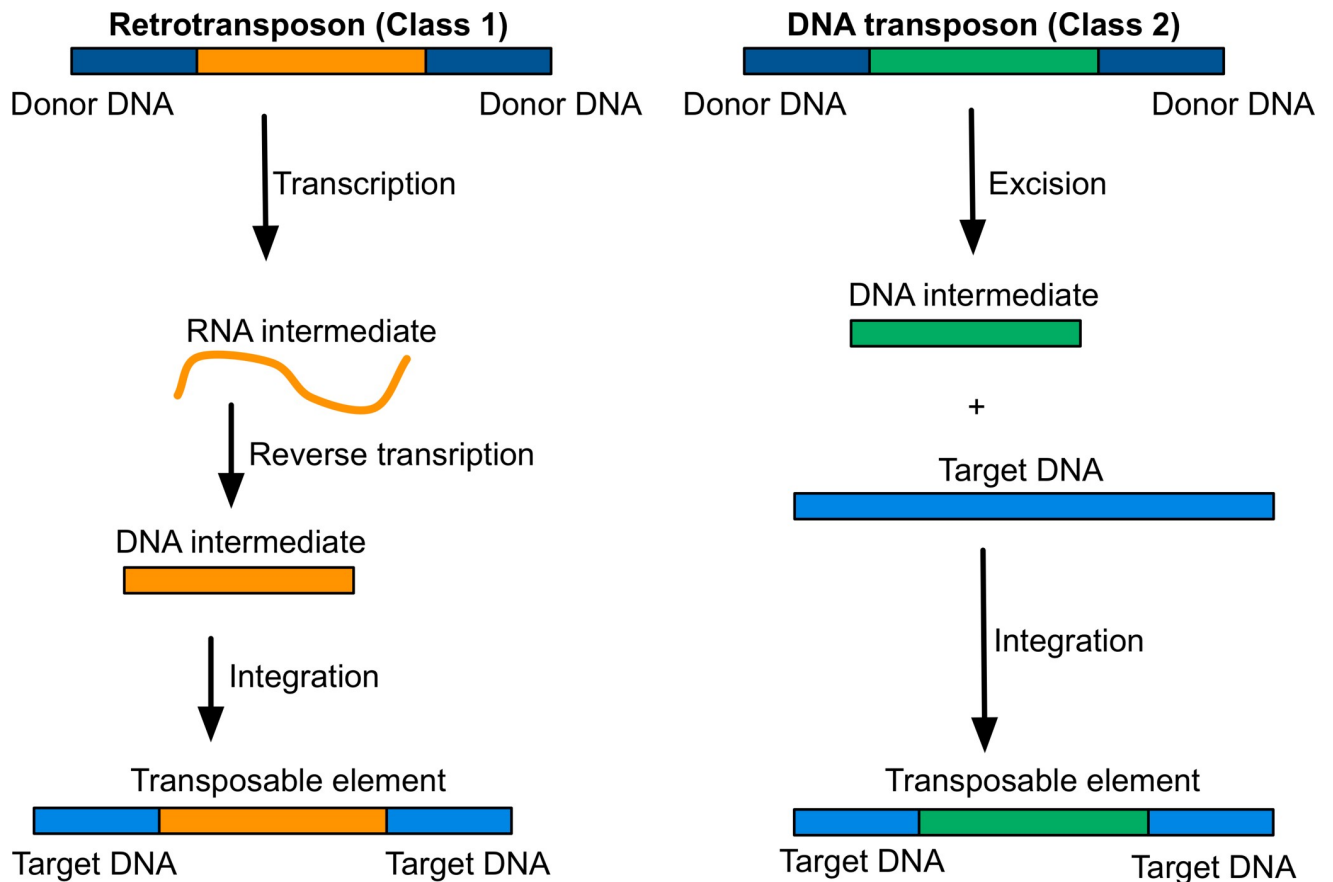

**Fig 4. Transposable elements self-replicate through two main mechanisms: via an RNA intermediate ("copy-and-paste"; class 1) or straight excision-insertion ("cut-and-paste"; class 2).**

<https://doi.org/10.1371/journal.pgen.1007700.g004>

Both plant and animal hosts have evolved means for reducing the fitness impact of TEs, both by directly silencing them and by reducing their ability to transpose in the genome. It would appear that hosts in general are fairly tolerant of TEs in their genomes, since a sizable portion (30–80%) of the genome of many animals and plants is TEs.[60,61] When the host is able to stop their movement, TEs can simply be frozen in place, and it then can take millions of years for them to mutate away. The fitness of a TE is a combination of its ability to expand in numbers within a genome, to evade host defences, but also to avoid eroding host fitness too drastically. The effect of TEs in the genome is not entirely selfish. Because their insertion into the genome can disrupt gene function, sometimes those disruptions can have positive fitness value for the host. Many adaptive changes in *Drosophila*[62] and dogs[63] for example, are associated with TE insertions.

### B chromosomes

**B chromosomes** refer to chromosomes that are not required for the viability or fertility of the organism, but exist in addition to the normal (A) set.[64] They persist in the population and accumulate because they have the ability to propagate their own transmission independently of the A chromosomes (Fig 5). They often vary in copy number between individuals of the same species.

B chromosomes were first detected over a century ago.[65] Though typically smaller than normal chromosomes, their gene poor, heterochromatin-rich structure made them visible to

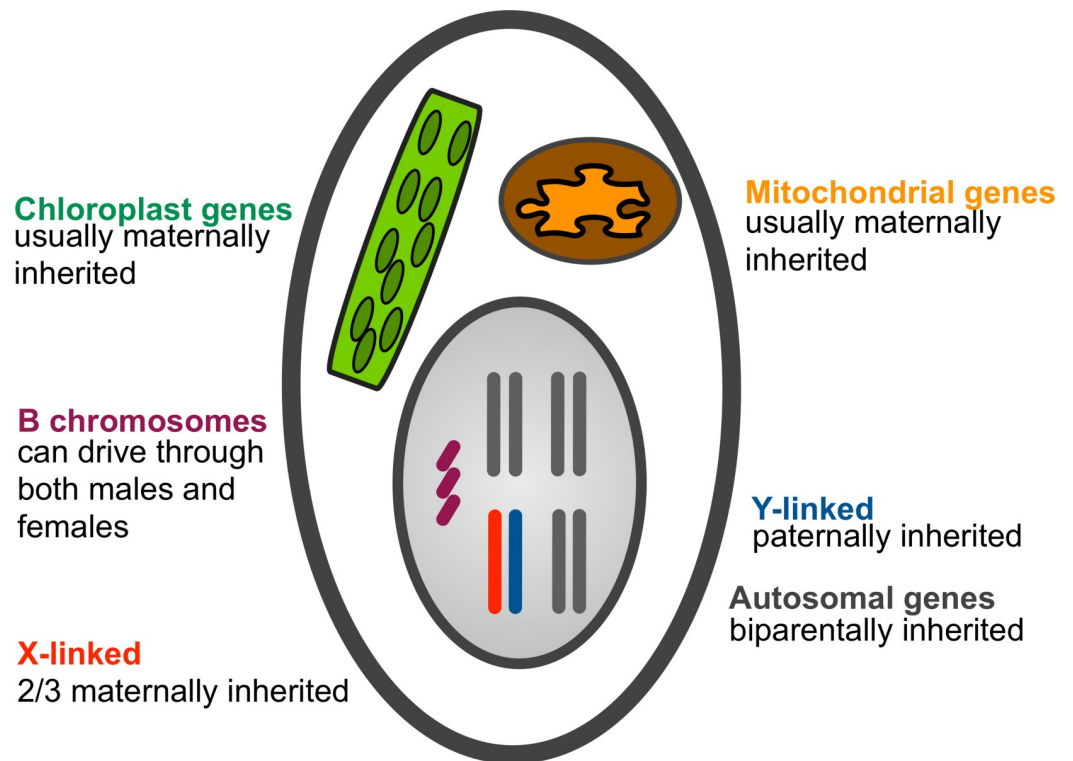

**Fig 5. Genetic conflicts often arise because not all genes are inherited in the same way.** Examples include cytoplasmic male sterility (see Selfish mitochondria). While mitochondrial and chloroplast genes are generally maternally inherited, B chromosomes can be preferentially transmitted through both males and females.

<https://doi.org/10.1371/journal.pgen.1007700.g005>

early cytogenetic techniques. B chromosomes have been thoroughly studied and are estimated to occur in 15% of all eukaryotic species.[66] In general, they appear to be particularly common among eudicot plants, rare in mammals, and absent in birds. In 1945, they were the subject of Gunnar Östergren’s classic paper “Parasitic nature of extra fragment chromosomes”, where he argues that the variation in abundance of B chromosomes between and within species is because of the parasitic properties of the Bs (see above).[14] This was the first time genetic material was referred to as “parasitic” or “selfish”. B chromosome number correlates positively with genome size[67] and has also been linked to a decrease in egg production in the grasshopper *Eyprepocnemis plorans*.[68]

### Selfish mitochondria

Genomic conflicts often arise because not all genes are inherited in the same way. Probably the best example of this is the conflict between **uniparentally** (usually but not always, maternally) inherited mitochondrial and biparentally inherited nuclear genes. Indeed, one of the earliest clear statement about the possibility of genomic conflict was made by the English botanist Dan Lewis in reference to the conflict between maternally inherited mitochondrial and biparentally inherited nuclear genes over sex allocation in **hermaphroditic** plants (Fig 5).[16]

A single cell typically contains multiple mitochondria, creating a situation for competition over transmission. Uniparental inheritance been suggested to be a way to reduce the opportunity for selfish mitochondria to spread, as it ensures all mitochondria share the same genome, thus removing the opportunity for competition. [28,69,70] This view remains widely held, but has been challenged.[71] Why inheritance ended up being maternal, rather than paternal, is



also much debated, but one key hypothesis is that the mutation rate is lower in female compared to male gametes.[72]

The conflict between mitochondrial and nuclear genes is especially easy to study in flowering plants.[73,74] Flowering plants are typically hermaphrodites,[75] and the conflict thus occurs within a single individual. Mitochondrial genes are typically only transmitted through female gametes, and therefore from their point of view the production of pollen leads to an evolutionary dead end. Any mitochondrial mutation that can affect the amount of resources the plant invests in the female reproductive functions at the expense of the male reproductive functions improves its own chance of transmission. *Cytoplasmic male sterility* is the loss of male fertility, typically through loss of functional pollen production, resulting from a mitochondrial mutation.[76] In many species where cytoplasmic male sterility occurs, the nuclear genome has evolved so-called restorer genes, which repress the effects of the cytoplasmic male sterility genes and restore the male function, making the plant a hermaphrodite again.[77,78]

The co-evolutionary arms race between selfish mitochondrial genes and nuclear compensatory alleles can often be detected by crossing individuals from different species that have different combinations of male sterility genes and nuclear restorers, resulting in hybrids with a mismatch.[79]

Another consequence of the maternal inheritance of the mitochondrial genome is the so-called *Mother's Curse*.[80] Because genes in the mitochondrial genome are strictly maternally inherited, mutations that are beneficial in females can spread in a population even if they are deleterious in males.[81] Explicit screens in fruit flies have successfully identified such female-neutral but male-harming mtDNA mutations.[82,83] Furthermore, a 2017 paper showed how a mitochondrial mutation causing *Leber's hereditary optic neuropathy*, a male-biased eye disease, was brought over by one of the *Filles du roi* that arrived in Quebec, Canada, in the 17th century and subsequently spread among many descendants.[84]

## Genomic imprinting

Another sort of conflict that genomes face is that between the mother and father competing for control of gene expression in the offspring, including the complete silencing of one parental allele. Due to differences in methylation status of gametes, there is an inherent asymmetry to the maternal and paternal genomes that can be used to drive a differential parent-of-origin expression. This results in a violation of Mendel's rules at the level of expression, not transmission, but if the gene expression affects fitness, it can amount to a similar end result.

Imprinting seems like a maladaptive phenomenon, since it essentially means giving up diploidy, and heterozygotes for one defective allele are in trouble if the active allele is the one that is silenced. Several human diseases, such as *Prader-Willi* and *Angelman* syndromes, are associated with defects in imprinted genes. The asymmetry of maternal and paternal expression suggests that some kind of conflict between these two genomes might be driving the evolution of imprinting. In particular, several genes in placental mammals display expression of paternal genes that maximize offspring growth, and maternal genes that tend to keep that growth in check (Fig 6). Many other conflict-based theories about the evolution of genomic imprinting have been put forward.[85,86]

At the same time, genomic or sexual conflict are not the only possible mechanisms whereby imprinting can evolve.[87] Several molecular mechanisms for genomic imprinting have been described, and all have the aspect that maternally and paternally derived alleles are made to have distinct epigenetic marks, in particular the degree of methylation of cytosines. An important point to note regarding genomic imprinting is that it is quite heterogeneous, with different mechanisms and different consequences of having single parent-of-origin expression. For

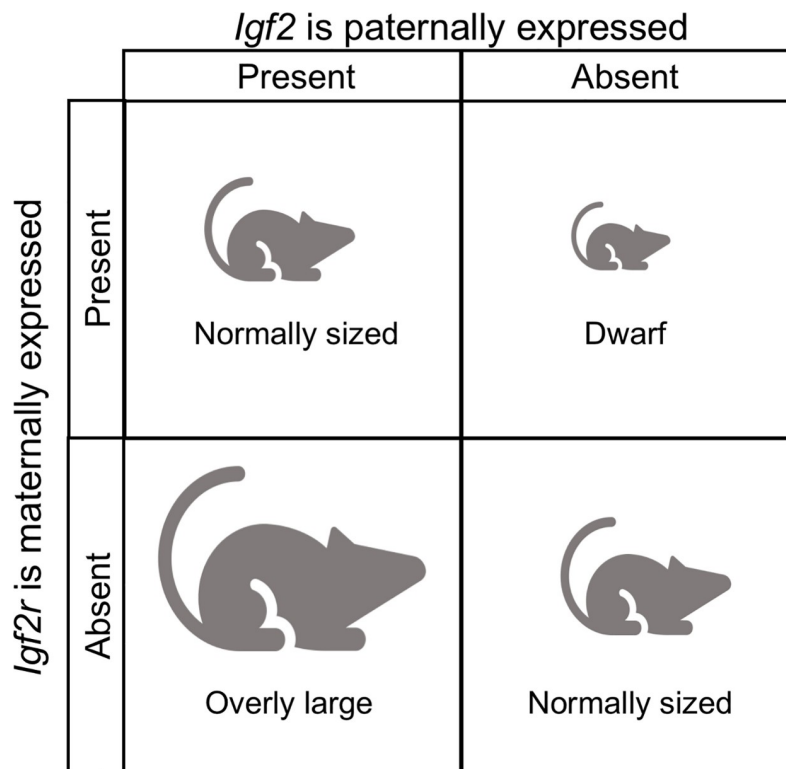

**Fig 6. *Igf2* is an example of genomic imprinting.** In mice, the insulin-like growth factor 2 gene, *Igf2*, which is linked to hormone production and increased offspring growth is paternally expressed (maternally silenced) and the insulin-like growth factor 2 receptor gene *Igf2r*, which binds the growth protein and so slows growth, is maternally expressed (paternally silenced). The offspring is normal sized when both genes are present, or both genes are absent. When the maternally expressed gene (*Igf2r*) is experimentally knocked out the offspring has an unusually large size, and when the paternally expressed gene (*Igf2*) is knocked out, the offspring is unusually small.

<https://doi.org/10.1371/journal.pgen.1007700.g006>

example, examining the imprinting status of closely related species allows one to see that a gene that is moved by an inversion into close proximity of imprinted genes may itself acquire an imprinted status, even if there is no particular fitness consequence of the imprinting.

### Greenbeards

A [greenbeard gene](#) is a gene that have the ability to recognize copies of itself in another individuals and then make its carrier act preferentially toward such individuals. The name itself comes from thought-experiment first presented by Bill Hamilton[88] and then it was developed and given its current name by Richard Dawkins in *The Selfish Gene*. The point of the thought experiment was to highlight that from a gene's-eye view, it is not the genome-wide relatedness that matters (which is usually how kin selection operates, i.e. cooperative behavior is directed towards relatives), but the relatedness at the particular locus that underlies the social behavior.

Following Dawkins, a greenbeard is usually defined as a gene, or set of closely linked genes, that has three effects[89,90]:

1. It gives carriers of the gene a phenotypic label, such as a green beard.
2. The carrier is able to recognize other individuals with the same label.
3. The carrier then behaves altruistically towards individuals with the same label (Fig 7).

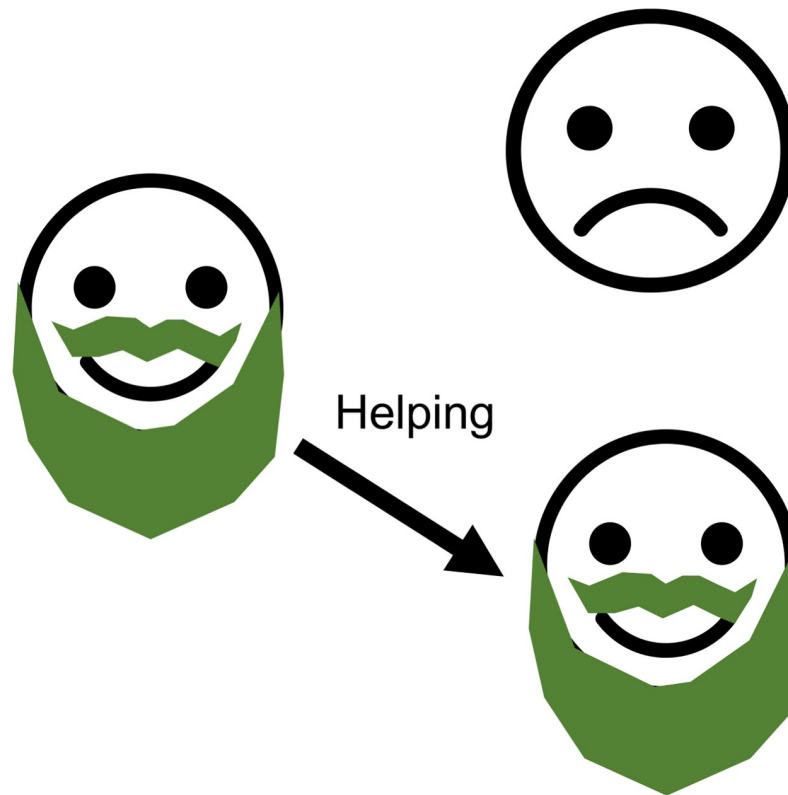

**Fig 7. The simplest form of greenbeard mechanism.** An individual with the greenbeard allele preferentially helps a fellow greenbeard individual.

<https://doi.org/10.1371/journal.pgen.1007700.g007>

Greenbeards were long thought to be a fun theoretical idea with limited possibility of actually existing in nature. However, since its conception several examples have been identified, including in yeast[91], slime moulds[92], and fire ants[93].

There has been some debate whether greenbeard genes should be considered selfish genetic elements. [94–96] Conflict between a greenbeard locus and the rest of the genome can arise because during a given social interaction between two individuals, the relatedness at the greenbeard locus can be higher than at other loci in the genome. As a consequence, it may be in the interest of the greenbeard locus to perform a costly social act, but not in the interest of the rest of the genome.

## Consequences to the host of selfish genetic elements

### Species extinction

Perhaps one of the clearest ways to see that the process of natural selection does not always have organismal fitness as the sole driver is when selfish genetic elements have their way without restriction. In such cases, selfish elements can, in principle, result in species extinction. This possibility was pointed out already in 1928 by Sergey Gershenson[13] and then in 1967, Bill Hamilton[97] developed a formal population genetic model for a case of segregation distortion of sex chromosomes driving a population to extinction. In particular, if a selfish element should be able to direct the production of sperm, such that males bearing the element on the Y chromosome would produce an excess of Y-bearing sperm, then in the absence of any countervailing force, this would ultimately result in the Y chromosome going to fixation in the

population, producing an extremely male-biased sex ratio. In ecologically challenged species, such biased sex ratios imply that the conversion of resources to offspring becomes very inefficient, to the point of risking extinction.

## Speciation

Selfish genetic elements have been shown to play a role in [speciation](#).[\[41,42,98\]](#) This could happen because the presence of selfish genetic elements can result in changes in morphology and/or life history, but ways by which the co-evolution between selfish genetic elements and their suppressors can cause reproductive isolation through so-called [Bateson-Dobzhansky-Muller incompatibilities](#) has received particular attention.

An early striking example of hybrid dysgenesis induced by a selfish genetic element was the *P* element in *Drosophila*.[\[99,100\]](#) If males carrying the *P* element were crossed to females lacking it, the resulting offspring suffered from reduced fitness. However, offspring of the reciprocal cross were normal, as would be expected since [piRNAs](#) are maternally inherited. The *P* element is typically present only in wild strains, and not in lab strains of *D. melanogaster*, as the latter were collected before the *P* elements were introduced into the species, probably from a closely related *Drosophila* species. The *P* element story is also a good example of how the rapid co-evolution between selfish genetic elements and their silencers can lead to incompatibilities on short evolutionary time scales, as little as within a few decades.

Several other examples of selfish genetic elements causing reproductive isolation have since been demonstrated. Crossing different species of *Arabidopsis* results in both higher activity of transposable elements[\[101\]](#) and disruption in imprinting,[\[102\]](#) both of which have been linked to fitness reduction in the resulting hybrids. Hybrid dysgenesis has also been shown to be caused by centromeric drive in barley[\[103\]](#) and in several species of angiosperms by mitochondrial conflict.[\[104\]](#)

## Genome size variation

Attempts to understand the extraordinary variation in genome size ([C-value](#))—animals vary 7,000 fold and land plants some 2,400-fold—has a long history in biology.[\[105\]](#) However, this variation is poorly correlated with gene number or any measure of organismal complexity, which led CA Thomas to coin the term C-value paradox in 1971.[\[106\]](#) The discovery of non-coding DNA resolved some of the paradox, and most current researchers now use the term “C-value enigma”.[\[107\]](#)

Two kinds of selfish genetic elements in particular have been shown to contribute to genome size variation: B chromosomes and transposable elements.[\[67,108\]](#) The contribution of transposable elements to the genome is especially well studied in plants.[\[60,61,109\]](#) A striking example is how the genome of the model organism *Arabidopsis thaliana* contains the same number of genes as that of the Norwegian spruce (*Picea abies*), around 30,000, but accumulation of transposons means that the genome of the latter is some 100 times larger. Transposable element abundance has also been shown to cause the unusually large genomes found in salamanders.[\[110\]](#)

The presence of an abundance of transposable elements in many eukaryotic genomes was a central theme of the original selfish DNA papers mentioned above (See Conceptual developments). Most people quickly accepted the central message of those papers, that the existence of transposable elements can be explained by selfish selection at the gene level and there is no need to invoke individual level selection. However, the idea that organisms keep transposable elements around as genetic reservoir to “speed up evolution” or for other regulatory functions persists in some quarters.[\[111\]](#) In 2012, when the [ENCODE Project](#) published a paper

claiming that 80% of the human genome can be assigned a function, a claim interpreted by many as the death of the idea of [junk DNA](#), this debate was reignited.[112,113]

## Applications of selfish genetic elements in agriculture and biotechnology

### Cytoplasmic male sterility in plant breeding

A common problem for plant breeders is unwanted self-fertilization. This is particularly a problem when breeders try to cross two different strains to create a new hybrid strain. One way to avoid this is manual emasculation, i.e. physically removing anthers to render the individual male sterile. Cytoplasmic male sterility offers an alternative to this laborious exercise. [114] Breeders cross a strain that carries a cytoplasmic male sterility mutation with a strain that does not, the latter acting as the pollen donor. If the hybrid offspring are to be harvested for their seed (like maize), and therefore needs to be male fertile, the parental strains need to be homozygous for the restorer allele. In contrast, in species that harvested for their vegetable parts, like onions, this is not an issue. This technique has been used in a wide variety of crops, including rice, maize, sunflower, wheat, and cotton.[115]

### PiggyBac vectors

While many transposable elements seem to do no good for the host, some transposable elements have been “tamed” by molecular biologists so that the elements can be made to insert and excise at the will of the scientist. Such elements are especially useful for doing genetic manipulations, like inserting foreign DNA into the genomes of a variety of organisms.

One excellent example of this is [PiggyBac](#), a transposable element that can efficiently move between cloning vectors and chromosomes using a “cut and paste” mechanism.[116] The investigator constructs a PiggyBac element with the desired payload spliced in, and a second element (the PiggyBac transposase), located on another plasmid vector, can be co-transfected into the target cell. The PiggyBac transposase cuts at the inverted terminal repeat sequences located on both ends of the PiggyBac vector and efficiently moves the contents from the original sites and integrates them into chromosomal positions where the sequence TTAA is found. The three things that make PiggyBac so useful are the remarkably high efficiency of this cut-and-paste operation, its ability to take payloads up to 200 kb in size, and its ability to leave a perfectly seamless cut from a genomic site, leaving no sequences or mutations behind.[117]

### CRISPR gene drive and homing endonuclease systems

[CRISPR](#) allows the construction of artificial homing endonucleases, where the construct produces guide RNAs that cut the target gene, and homologous flanking sequences then allow insertion of the same construct harboring the Cas9 gene and the guide RNAs. Such gene drives ought to have the ability to rapidly spread in a population (see section below on the theory of gene drives), and one practical application of such a system that has been proposed is to apply it to a pest population, greatly reducing its numbers or even driving it extinct.[56] This has not yet been attempted in the field, but gene drive constructs have been tested in the lab, and the ability to insert into the wild-type homologous allele in heterozygotes for the gene drive has been demonstrated.[55] Unfortunately, the double-strand break that is introduced by Cas9 can be corrected by [Homology directed repair](#), which would make a perfect copy of the drive, or by [Non-homologous end joining](#), which would produce “resistant” alleles unable to further propagate themselves. When Cas9 is expressed outside of meiosis, it seems like non-homologous end joining predominates, making this the biggest hurdle to practical application of gene drives.[118]

## Mathematical theory of selfish genetic elements

Much of the confusion regarding ideas about selfish genetic elements center on the use of language and the way the elements and their evolutionary dynamics are described.[119] The beauty of mathematical models is that we can all agree on the assumptions and the rules for establishing mathematical statements about the expected dynamics of the elements in populations, and then explore the consequences of having such elements in genomes. The mathematics can define very crisply the different classes of elements by their precise behavior within a population, sidestepping any distracting verbiage about the inner hopes and desires of greedy selfish genes. There are many good examples of this approach, and we will focus on segregation distorters, gene drive systems and transposable elements.

### Segregation distorters

The mouse t-allele is a classic example of a segregation distorter system that has been modeled in great detail.[51,120] Heterozygotes for a t-haplotype produce >90% of their gametes bearing the t (segregation distortion, see above), and homozygotes for a t-haplotype die as embryos. This can result in a stable polymorphism, with an equilibrium frequency that depends on the drive strength and direct fitness impacts of t-haplotypes. This is a common theme in the mathematics of segregation distorters: virtually every example we know entails a countervailing selective effect, without which the allele with biased transmission would go to fixation and the segregation distortion would no longer be manifested. Whenever sex chromosomes undergo segregation distortion, the population sex ratio is altered, making these systems particularly interesting. Two classic examples of segregation distortion involving sex chromosomes include the “Sex Ratio” X chromosomes of *Drosophila pseudoobscura*[49] and Y chromosome drive suppressors of *Drosophila mediopunctata*. [121] A crucial point about the theory of segregation distorters is that just because there are fitness effects acting against the distorter, this does not guarantee that there will be a stable polymorphism. In fact, some sex chromosome drivers can produce frequency dynamics with wild oscillations and cycles. [122]

### Gene drive systems

The idea of spreading a gene into a population as a means of population control is actually quite old, and models for the dynamics of introduced compound chromosomes date back to the 1970s.[123] More recently, the population genetics theory for homing endonucleases and CRISPR-based gene drives has become much more advanced.[52,124] An important component of modeling these processes in natural populations is to consider the genetic response in the target population. For one thing, any natural population will harbor standing genetic variation, and that variation might well include polymorphism in the sequences homologous to the guide RNAs, or the homology arms that are meant to direct the repair. In addition, different hosts and different constructs may have quite different rates of non-homologous end joining, the form of repair that results in broken or resistant alleles that no longer spread. Full accommodation of the host factors presents considerable challenge for getting a gene drive construct to go to fixation, and Unckless and colleagues[125] show that in fact the current constructs are quite far from being able to attain even moderate frequencies in natural populations. This is another excellent example showing that just because an element appears to have a strong selfish transmission advantage, whether it can successfully spread may depend on subtle configurations of other parameters in the population.

## Transposable elements

To model the dynamics of transposable elements (TEs) within a genome, one has to realize that the elements behave like a population within each genome, and they can jump from one haploid genome to another by horizontal transfer. The mathematics has to describe the rates and dependencies of these transfer events. It was observed early on that the rate of jumping of many TEs varies with copy number, and so the first models simply used an empirical function for the rate of transposition. This had the advantage that it could be measured by experiments in the lab, but it left open the question of why the rate differs among elements and differs with copy number. Stan Sawyer and Daniel L. Hartl[126] fitted models of this sort to a variety of bacterial TEs, and obtained quite good fits between copy number and transmission rate and the population-wide incidence of the TEs. TEs in higher organisms, like *Drosophila*, have a very different dynamics because of sex, and Brian Charlesworth, Deborah Charlesworth, Charles Langley, John Brookfield and others[34,127,128] modeled TE copy number evolution in *Drosophila* and other species. What is impressive about all these modeling efforts is how well they fitted empirical data, given that this was decades before discovery of the fact that the host fly has a powerful defense mechanism in the form of piRNAs. Incorporation of host defense along with TE dynamics into evolutionary models of TE regulation is still in its infancy.[129]

## Future directions

Selfish genetic elements have gone from being seen as genetic oddities with little significance to be considered major players in evolution. We now know that their presence and co-evolution with suppressors can affect a range of features at the genome, phenotype, and population levels. While the influx of whole genome data has done much to bring this shift about, particularly for the study of transposable elements, developments in mathematical modelling has also played a key role. The adaption of CRISPR technologies to engineer gene drive systems for population control has added a new rapidly advancing applied dimension to the study of selfish genetic elements.

## Supporting information

### S1 Text. Version history of the text file.

(XML)

### S2 Text. Peer reviews and response to reviews.

(XML)

## References

1. Werren JH, Nur U, Wu CI. Selfish genetic elements. *Trends Ecol Evol.* 1988; 3: 297–302. [https://doi.org/10.1016/0169-5347\(88\)90105-X](https://doi.org/10.1016/0169-5347(88)90105-X) PMID: 21227262
2. Hurst GD, Hurst LD, Johnstone RA. Intranuclear conflict and its role in evolution. *Trends Ecol Evol.* 1992; 7: 373–378. [https://doi.org/10.1016/0169-5347\(92\)90007-X](https://doi.org/10.1016/0169-5347(92)90007-X) PMID: 21236071
3. Hurst LD, Atlan A, Bengtsson BO. Genetic conflicts. *Q Rev Biol.* 1996; 71: 317–364. PMID: 8828237
4. Hurst GD, Werren JH. The role of selfish genetic elements in eukaryotic evolution. *Nat Rev Genet.* 2001; 2: 597–606. <https://doi.org/10.1038/35084545> PMID: 11483984
5. McLaughlin RN Jr, Malik HS. Genetic conflicts: the usual suspects and beyond. *J Exp Biol.* 2017; 220: 6–17. <https://doi.org/10.1242/jeb.148148> PMID: 28057823
6. Gardner A, Úbeda F. The meaning of intragenomic conflict. *Nat Ecol Evol.* 2017; 1: 1807–1815. <https://doi.org/10.1038/s41559-017-0354-9> PMID: 29109471

7. Williams GC. *Adaptation and Natural Selection: A Critique of Some Current Evolutionary Thought*. Princeton University Press; 1966.
8. Dawkins R. *The Selfish Gene* Oxford University Press. Oxford University Press; 1976.
9. Orgel LE, Crick FH. Selfish DNA: the ultimate parasite. *Nature*. 1980; 284: 604–607. PMID: [7366731](#)
10. Doolittle WF, Sapienza C. Selfish genes, the phenotype paradigm and genome evolution. *Nature*. 1980; 284: 601–603. PMID: [6245369](#)
11. Burt A, Trivers R. *Genes in Conflict: The Biology of Selfish Genetic Elements*. Harvard University Press; 2006.
12. Werren JH. Selfish genetic elements, genetic conflict, and evolutionary innovation. *Proc Natl Acad Sci USA*. 2011; 108: 10863–10870. <https://doi.org/10.1073/pnas.1102343108> PMID: [21690392](#)
13. Gershenson S. A new sex-ratio abnormality in *Drosophila obscura*. *Genetics*. 1928; 13: 488–507. PMID: [17246563](#)
14. Östergren G. Parasitic nature of extra fragment chromosomes. *Botaniska Notiser*. 1945; 2: 157–163.
15. Rhoades MM. Preferential segregation in maize. *Genetics*. 1942; 27: 395–407. PMID: [17247049](#)
16. Lewis D. Male sterility in natural populations of hermaphrodite plants the equilibrium between females and hermaphrodites to be expected with different types of inheritance. *New Phytol*. 1941; 46: 56–63.
17. McClintock B. The origin and behavior of mutable loci in maize. *Proc Natl Acad Sci USA*. 1950; 36: 344–355. PMID: [15430309](#)
18. McClintock B. Controlling elements and the gene. *Cold Spring Harb Symp Quant Biol*. 1956; 21: 197–216. PMID: [13433592](#)
19. Ågren JA. Selfish genetic elements and the gene's-eye view of evolution. *Curr Zool*. 2016; 62: 659–665. <https://doi.org/10.1093/cz/zow102> PMID: [29491953](#)
20. Ågren JA, Hurst GDD. *Selfish Genes*. In *Oxford Bibliographies Online*. Oxford University Press; 2017. <https://doi.org/10.1093/obo/9780199941728-0094>
21. Dawkins R. *The Extended Phenotype*. Oxford University Press; 1982.
22. Dawkins R. Replicators and vehicles. In: King's College Sociobiology Group, editor. *Current Problems in Sociobiology*. Cambridge University Press; 1982. pp. 45–64.
23. Hull DL. Units of Evolution: A Metaphysical Essay. In: Jensen UJ, Harré R, editors. *The Philosophy of Evolution*. St. Martin's Press; 1981. pp. 23–44.
24. Cavalier-Smith T. How selfish is DNA? *Nature*. 1980; 285: 617–618. PMID: [7393317](#)
25. Dover G. Ignorant DNA? *Nature*. 1980; 285: 618–620. PMID: [7393318](#)
26. Dover G, Doolittle WF. Modes of genome evolution. *Nature*. 1980; 288: 646–647. PMID: [6256636](#)
27. Orgel LE, Crick FH, Sapienza C. Selfish DNA. *Nature*. 1980; 288: 645–646. PMID: [7453798](#)
28. Cosmides LM, Tooby J. Cytoplasmic inheritance and intragenomic conflict. *J Theor Biol*. 1981; 89: 83–129. PMID: [7278311](#)
29. Rice WR. Nothing in genetics makes sense except in light of genomic conflict. *Annu Rev Ecol Evol Syst*. 2013; 44: 217–237.
30. Leigh EG. *Adaptation and Diversity: Natural History and the Mathematics of Evolution*. Freeman, Cooper; 1971
31. Hickey DA. Selfish DNA: a sexually-transmitted nuclear parasite. *Genetics*. 1982; 101: 519–531. PMID: [6293914](#)
32. Wright S, Finnegan D. Genome evolution: sex and the transposable element. *Curr Biol*. 2001; 11: R296–9. PMID: [11369217](#)
33. Wright SI, Schoen DJ. Transposon dynamics and the breeding system. *Genetica*. 1999; 107: 139–148. PMID: [10952207](#)
34. Charlesworth B, Langley CH. The evolution of self-regulated transposition of transposable elements. *Genetics*. 1986; 112: 359–383. PMID: [3000868](#)
35. Nordborg M. Linkage disequilibrium, gene trees and selfing: an ancestral recombination graph with partial self-fertilization. *Genetics*. 2000; 154: 923–929. PMID: [10655241](#)
36. Arkhipova I, Meselson M. Transposable elements in sexual and ancient asexual taxa. *Proc Natl Acad Sci USA*. 2000; 97: 14473–14477. <https://doi.org/10.1073/pnas.97.26.14473> PMID: [11121049](#)
37. Ågren JA, Wang W, Koenig D, Neuffer B, Weigel D, Wright SI. Mating system shifts and transposable element evolution in the plant genus *Capsella*. *BMC Genomics*. 2014; 15: 602. <https://doi.org/10.1186/1471-2164-15-602> PMID: [25030755](#)



38. Harrison E, MacLean RC, Koufopanou V, Burt A. Sex drives intracellular conflict in yeast. *J Evol Biol*. 2014; 27: 1757–1763. <https://doi.org/10.1111/jeb.12408> PMID: 24825743
39. Burt A, Trivers R. Selfish DNA and breeding system in flowering plants. *Proc R Soc Lond B Biol Sci*. 1998; 265: 141–146.
40. Aravin AA, Hannon GJ, Brennecke J. The Piwi-piRNA pathway provides an adaptive defense in the transposon arms race. *Science*. 2007; 318: 761–764. <https://doi.org/10.1126/science.1146484> PMID: 17975059
41. Crespi B, Nosil P. Conflictual speciation: species formation via genomic conflict. *Trends Ecol Evol*. 2013; 28: 48–57. <https://doi.org/10.1016/j.tree.2012.08.015> PMID: 22995895
42. Ågren JA. Selfish senes and plant speciation. *Evol Biol*. 2013; 40: 439–449.
43. Ganetzky B. On the components of segregation distortion in *Drosophila melanogaster*. *Genetics*. 1977; 86: 321–355. PMID: 407128
44. Brittnacher JG, Ganetzky B. On the Components of Segregation Distortion in *Drosophila melanogaster*. II. Deletion Mapping and Dosage Analysis of the SD Locus. *Genetics*. 1983; 103: 659–673. PMID: 17246120
45. Brittnacher JG, Ganetzky B. On the components of segregation distortion in *Drosophila melanogaster*. III. Nature of enhancer of SD. *Genetics*. 1984; 107: 423–434. PMID: 6428976
46. Brittnacher JG, Ganetzky B. On the components of segregation distortion in *Drosophila melanogaster*. IV. Construction and analysis of free duplications for the Responder locus. *Genetics*. 1989; 121: 739–750. PMID: 2498160
47. Powers PA, Ganetzky B. On the components of segregation distortion in *Drosophila melanogaster*. V. Molecular analysis of the Sd locus. *Genetics*. 1991; 129: 133–144. PMID: 1936954
48. Larracuent AM, Presgraves DC. The selfish Segregation Distorter gene complex of *Drosophila melanogaster*. *Genetics*. 2012; 192: 33–53. <https://doi.org/10.1534/genetics.112.141390> PMID: 22964836
49. Curtsinger JW, Feldman MW. Experimental and Theoretical Analysis of the “Sex-Ratio” Polymorphism in *Drosophila pseudoobscura*. *Genetics*. 1980; 94: 445–466. PMID: 17249004
50. Curtsinger JW. Artificial selection on the sex ratio in *Drosophila pseudoobscura*. *J Hered*. 1981; 72: 377–381.
51. Lyon MF. Transmission ratio distortion in mice. *Annu Rev Genet*. 2003; 37: 393–408. <https://doi.org/10.1146/annurev.genet.37.110801.143030> PMID: 14616067
52. Burt A. Site-specific selfish genes as tools for the control and genetic engineering of natural populations. *Proc R Soc Lond B Biol Sci*. 2003; 270: 921–928.
53. Burt A, Koufopanou V. Homing endonuclease genes: the rise and fall and rise again of a selfish element. *Curr Opin Genet Dev*. 2004; 14: 609–615. <https://doi.org/10.1016/j.gde.2004.09.010> PMID: 15531154
54. Windbichler N, Menichelli M, Papatianos PA, Thyme SB, Li H, Ulge UY, et al. A synthetic homing endonuclease-based gene drive system in the human malaria mosquito. *Nature*. 2011; 473: 212–215. <https://doi.org/10.1038/nature09937> PMID: 21508956
55. Gantz VM, Bier E. Genome editing. The mutagenic chain reaction: a method for converting heterozygous to homozygous mutations. *Science*. 2015; 348: 442–444. <https://doi.org/10.1126/science.aaa5945> PMID: 25908821
56. Esvelt KM, Smidler AL, Catteruccia F, Church GM. Concerning RNA-guided gene drives for the alteration of wild populations. *eLife*. 2014; 3: e03401. <https://doi.org/10.7554/eLife.03401> PMID: 25035423
57. Ravindran S. Barbara McClintock and the discovery of jumping genes. *Proc Natl Acad Sci USA*. 2012; 109: 20198–20199. <https://doi.org/10.1073/pnas.1219372109> PMID: 23236127
58. Lisch D. How important are transposons for plant evolution? *Nat Rev Genet*. 2013; 14: 49–61. <https://doi.org/10.1038/nrg3374> PMID: 23247435
59. Hancks DC, Kazazian HH Jr. Roles for retrotransposon insertions in human disease. *Mob DNA*. 2016; 7: 9. <https://doi.org/10.1186/s13100-016-0065-9> PMID: 27158268
60. Ågren JA, Wright SI. Co-evolution between transposable elements and their hosts: a major factor in genome size evolution? *Chromosome Res*. 2011; 19: 777–786. <https://doi.org/10.1007/s10577-011-9229-0> PMID: 21850458
61. Tenailon MI, Hollister JD, Gaut BS. A triptych of the evolution of plant transposable elements. *Trends Plant Sci*. 2010; 15: 471–478. <https://doi.org/10.1016/j.tplants.2010.05.003> PMID: 20541961
62. Aminetzach YT, Macpherson JM, Petrov DA. Pesticide resistance via transposition-mediated adaptive gene truncation in *Drosophila*. *Science*. 2005; 309: 764–767. <https://doi.org/10.1126/science.1112699> PMID: 16051794

63. Cordaux R, Batzer MA. Teaching an old dog new tricks: SINEs of canine genomic diversity. *Proc Natl Acad Sci USA*. 2006; 103: 1157–1158. <https://doi.org/10.1073/pnas.0510714103> PMID: 16432182
64. Douglas RN, Birchler JA. B Chromosomes. *Chromosome Structure and Aberrations*. Springer, New Delhi; 2017. pp. 13–39.
65. Wilson E. The supernumerary chromosomes of Hemiptera. *Science*. 1907; 26: 870–871.
66. Beukeboom LW. Bewildering Bs: an impression of the 1st B-Chromosome Conference. *Heredity*. 1994; 73: 328–336.
67. Trivers R, Burt A, Palestis BG. B chromosomes and genome size in flowering plants. *Genome*. 2004; 47: 1–8. <https://doi.org/10.1139/g03-088> PMID: 15060596
68. Zurita S, Cabrero J, López-León MD, Camacho JPM. Polymorphism regeneration for a neutralized selfish B chromosome. *Evolution*. 1998; 52: 274–277. <https://doi.org/10.1111/j.1558-5646.1998.tb05163.x> PMID: 28568137
69. Hadjivasiliou Z, Lane N, Seymour RM, Pomiankowski A. Dynamics of mitochondrial inheritance in the evolution of binary mating types and two sexes. *Proc Biol Sci*. 2013; 280: 20131920. <https://doi.org/10.1098/rspb.2013.1920> PMID: 23986113
70. Law R, Hutson V. Intracellular symbionts and the evolution of uniparental cytoplasmic inheritance. *Proc R Soc Lond B Biol Sci*. 1992; 248: 69–77.
71. Christie JR, Schaerf TM, Beekman M. Selection against heteroplasmy explains the evolution of uniparental inheritance of mitochondria. *PLoS Genet*. 2015; 11: e1005112. <https://doi.org/10.1371/journal.pgen.1005112> PMID: 25880558
72. Greiner S, Sobanski J, Bock R. Why are most organelle genomes transmitted maternally? *BioEssays*. 2015; 37: 80–94. <https://doi.org/10.1002/bies.201400110> PMID: 25302405
73. Guo J, Liu Y. The genetic and molecular basis of cytoplasmic male sterility and fertility restoration in rice. *Chin Sci Bull*. 2009; 54: 2404–2409.
74. Schnable PS, Wise RP. The molecular basis of cytoplasmic male sterility and fertility restoration. *Trends Plant Sci*. 1998; 3: 175–180.
75. Barrett SCH. The evolution of plant sexual diversity. *Nat Rev Genet*. 2002; 3: 274–284. <https://doi.org/10.1038/nrg776> PMID: 11967552
76. Hanson MR, Bentolila S. Interactions of mitochondrial and nuclear genes that affect male gametophyte development. *Plant Cell*. 2004; 16: S154–169. <https://doi.org/10.1105/tpc.015966> PMID: 15131248
77. Budar F, Pelletier G. Male sterility in plants: occurrence, determinism, significance and use. *C R Acad Sci III*. 2001; 324: 543–550. PMID: 11455877
78. Budar F, Touzet P, De Paepe R. The nucleo-mitochondrial conflict in cytoplasmic male sterilities revisited. *Genetica*. 2003; 117: 3–16. PMID: 12656568
79. Case AL, Finseth FR, Barr CM, Fishman L. Selfish evolution of cytonuclear hybrid incompatibility in *Mimulus*. *Proc R Soc Lond B Biol Sci*. 2016; 283: 20161493.
80. Gemmill NJ, Metcalf VJ, Allendorf FW. Mother's curse: the effect of mtDNA on individual fitness and population viability. *Trends Ecol Evol*. 2004; 19: 238–244. <https://doi.org/10.1016/j.tree.2004.02.002> PMID: 16701262
81. Frank SA, Hurst LD. Mitochondria and male disease. *Nature*. 1996; 383: 224. <https://doi.org/10.1038/383224a0> PMID: 8805695
82. Camus MF, Clancy DJ, Dowling DK. Mitochondria, maternal inheritance, and male aging. *Curr Biol*. 2012; 22: 1717–1721. <https://doi.org/10.1016/j.cub.2012.07.018> PMID: 22863313
83. Patel MR, Miriyala GK, Littleton AJ, Yang H, Trinh K, Young JM, et al. A mitochondrial DNA hypomorph of cytochrome oxidase specifically impairs male fertility in *Drosophila melanogaster*. *eLife*. 2016; 5: e16923. <https://doi.org/10.7554/eLife.16923> PMID: 27481326
84. Milot E, Moreau C, Gagnon A, Cohen AA, Brais B, Labuda D. Mother's curse neutralizes natural selection against a human genetic disease over three centuries. *Nat Ecol Evol*. 2017; 1: 1400–1406. <https://doi.org/10.1038/s41559-017-0276-6> PMID: 29046555
85. Moore T, Haig D. Genomic imprinting in mammalian development: a parental tug-of-war. *Trends Genet*. 1991; 7: 45–49. [https://doi.org/10.1016/0168-9525\(91\)90230-N](https://doi.org/10.1016/0168-9525(91)90230-N) PMID: 2035190
86. Haig D. Coadaptation and conflict, misconception and muddle, in the evolution of genomic imprinting. *Heredity*. 2014; 113: 96–103. <https://doi.org/10.1038/hdy.2013.97> PMID: 24129605
87. Spencer HG, Clark AG. Non-conflict theories for the evolution of genomic imprinting. *Heredity*. 2014; 113: 112–118. <https://doi.org/10.1038/hdy.2013.129> PMID: 24398886
88. Hamilton WD. The genetical evolution of social behaviour. I. *J Theor Biol*. 1964; 7: 1–16. PMID: 5875341

89. Gardner A, West SA. Greenbeards. *Evolution*. 2010; 64: 25–38. <https://doi.org/10.1111/j.1558-5646.2009.00842.x> PMID: 19780812
90. West SA, Gardner A. Altruism, spite, and greenbeards. *Science*. 2010; 327: 1341–44. <https://doi.org/10.1126/science.1178332> PMID: 20223978
91. Smukalla S, Caldara M, Pochet N, Beauvais A, Guadagnini S, Yan C, et al. FLO1 is a variable green beard gene that drives biofilm-like cooperation in budding yeast. *Cell*. 2008; 135: 726–737. <https://doi.org/10.1016/j.cell.2008.09.037> PMID: 19013280
92. Queller DC, Ponte E, Bozzaro S, Strassmann JE. Single-gene greenbeard effects in the social amoeba *Dictyostelium discoideum*. *Science*. 2003; 299: 105–106. <https://doi.org/10.1126/science.1077742> PMID: 12511650
93. Keller L, Ross KG. Selfish genes: a green beard in the red fire ant. *Nature*. 1998; 394: 573.
94. Ridley M, Grafen A. Are green beard genes outlaws? *Anim Behav*. 1981; 29: 954–955.
95. Alexander RD, Borgia G. Group Selection, Altruism, and the Levels of Organization of Life. *Annu Rev Ecol Syst*. 1978; 9: 449–474.
96. Biernaskie JM, West SA, Gardner A. Are greenbeards intragenomic outlaws? *Evolution*. 2011; 65: 2729–2742. <https://doi.org/10.1111/j.1558-5646.2011.01355.x> PMID: 21967416
97. Hamilton WD. Extraordinary sex ratios. A sex-ratio theory for sex linkage and inbreeding has new implications in cytogenetics and entomology. *Science*. 1967; 156: 477–488. PMID: 6021675
98. Patten MM. Selfish X chromosomes and speciation. *Mol Ecol*. 2018; <https://doi.org/10.1111/mec.14471> PMID: 29281152
99. Engels WR. The origin of P elements in *Drosophila melanogaster*. *BioEssays*. 1992; 14: 681–686. <https://doi.org/10.1002/bies.950141007> PMID: 1285420
100. Kidwell MG. Evolution of hybrid dysgenesis determinants in *Drosophila melanogaster*. *Proc Natl Acad Sci USA*. 1983; 80: 1655–1659. PMID: 6300863
101. Josefsson C, Dilkes B, Comai L. Parent-dependent loss of gene silencing during interspecies hybridization. *Curr Biol*. 2006; 16: 1322–1328. <https://doi.org/10.1016/j.cub.2006.05.045> PMID: 16824920
102. Walia H, Josefsson C, Dilkes B, Kirkbride R, Harada J, Comai L. Dosage-dependent deregulation of an AGAMOUS-LIKE gene cluster contributes to interspecific incompatibility. *Curr Biol*. 2009; 19: 1128–1132. <https://doi.org/10.1016/j.cub.2009.05.068> PMID: 19559614
103. Sanei M, Pickering R, Kumke K, Nasuda S, Houben A. Loss of centromeric histone H3 (CENH3) from centromeres precedes uniparental chromosome elimination in interspecific barley hybrids. *Proc Natl Acad Sci USA*. 2011; 108: E498–505. <https://doi.org/10.1073/pnas.1103190108> PMID: 21746892
104. Rieseberg LH, Blackman BK. Speciation genes in plants. *Ann Bot*. 2010; 106: 439–455. <https://doi.org/10.1093/aob/mcq126> PMID: 20576737
105. Ryan Gregory T. *The Evolution of the Genome*. Academic Press; 2005.
106. Thomas CA Jr. The genetic organization of chromosomes. *Annu Rev Genet*. 1971; 5: 237–256. <https://doi.org/10.1146/annurev.ge.05.120171.001321> PMID: 16097657
107. Gregory TR. Macroevolution, hierarchy theory, and the C-value enigma. *Paleobiology*. 2004; 30: 179–202.
108. Ågren JA, Wright SI. Selfish genetic elements and plant genome size evolution. *Trends Plant Sci*. 2015; 20: 195–196. <https://doi.org/10.1016/j.tplants.2015.03.007> PMID: 25802093
109. Wright SI, Ågren JA. Sizing up Arabidopsis genome evolution. *Heredity*. 2011; 107: 509–510. <https://doi.org/10.1038/hdy.2011.47> PMID: 21712843
110. Sun C, Shepard DB, Chong RA, López Arriaza J, Hall K, Castoe TA, et al. LTR retrotransposons contribute to genomic gigantism in plethodontid salamanders. *Genome Biol Evol*. 2012; 4: 168–183. <https://doi.org/10.1093/gbe/evr139> PMID: 22200636
111. Fedoroff NV. Transposable elements, epigenetics, and genome evolution. *Science*. 2012; 338: 758–767. PMID: 23145453
112. Elliott TA, Linquist S, Gregory TR. Conceptual and empirical challenges of ascribing functions to transposable elements. *Am Nat*. 2014; 184: 14–24. <https://doi.org/10.1086/676588> PMID: 24921597
113. Palazzo AF, Gregory TR. The case for junk DNA. *PLoS Genet*. 2014; 10: e1004351. <https://doi.org/10.1371/journal.pgen.1004351> PMID: 24809441
114. Wise RP, Pring DR. Nuclear-mediated mitochondrial gene regulation and male fertility in higher plants: Light at the end of the tunnel? *Proc Natl Acad Sci USA*. 2002; 99: 10240–10242. <https://doi.org/10.1073/pnas.172388899> PMID: 12149484

115. Bohra A, Jha UC, Adhimoalam P, Bisht D, Singh NP. Cytoplasmic male sterility (CMS) in hybrid breeding in field crops. *Plant Cell Rep.* 2016; 35: 967–993. <https://doi.org/10.1007/s00299-016-1949-3> PMID: [26905724](https://pubmed.ncbi.nlm.nih.gov/26905724/)
116. Fraser MJ, Ciszczon T, Elick T, Bauser C. Precise excision of TTAA-specific lepidopteran transposons piggyBac (IFP2) and tagalong (TFP3) from the baculovirus genome in cell lines from two species of Lepidoptera. *Insect Mol Biol.* 1996; 5: 141–151. PMID: [8673264](https://pubmed.ncbi.nlm.nih.gov/8673264/)
117. Yusa K. Seamless genome editing in human pluripotent stem cells using custom endonuclease-based gene targeting and the piggyBac transposon. *Nat Protoc.* 2013; 8: 2061. <https://doi.org/10.1038/nprot.2013.126> PMID: [24071911](https://pubmed.ncbi.nlm.nih.gov/24071911/)
118. Champer J, Reeves R, Oh SY, Liu C, Liu J, Clark AG, et al. Novel CRISPR/Cas9 gene drive constructs reveal insights into mechanisms of resistance allele formation and drive efficiency in genetically diverse populations. *PLoS Genet.* 2017; 13: e1006796. <https://doi.org/10.1371/journal.pgen.1006796> PMID: [28727785](https://pubmed.ncbi.nlm.nih.gov/28727785/)
119. Gardner A, Welch JJ. A formal theory of the selfish gene. *J Evol Biol.* 2011; 24: 1801–1813. <https://doi.org/10.1111/j.1420-9101.2011.02310.x> PMID: [21605218](https://pubmed.ncbi.nlm.nih.gov/21605218/)
120. Lewontin RC, Dunn LC. The evolutionary dynamics of a polymorphism in the house mouse. *Genetics.* 1960; 45: 705–722. PMID: [17247957](https://pubmed.ncbi.nlm.nih.gov/17247957/)
121. Carvalho AB, Vaz SC, Klaczko LB. Polymorphism for Y-linked suppressors of sex-ratio in two natural populations of *Drosophila mediopunctata*. *Genetics.* 1997; 146: 891–902 PMID: [9215895](https://pubmed.ncbi.nlm.nih.gov/9215895/)
122. Clark AG. Natural selection and Y-linked polymorphism. *Genetics.* 1987; 115: 569–577. PMID: [3569883](https://pubmed.ncbi.nlm.nih.gov/3569883/)
123. Fitz-Earle M, Holm DG, Suzuki DT. Genetic control of insect population. I. Cage studies of chromosome replacement by compound autosomes in *Drosophila melanogaster*. *Genetics.* 1973; 74: 461–475. PMID: [4200686](https://pubmed.ncbi.nlm.nih.gov/4200686/)
124. Deredec A, Burt A, Godfray HCJ. The population genetics of using homing endonuclease genes in vector and pest management. *Genetics.* 2008; 179: 2013–2026. <https://doi.org/10.1534/genetics.108.089037> PMID: [18660532](https://pubmed.ncbi.nlm.nih.gov/18660532/)
125. Unckless RL, Clark AG, Messer PW. Evolution of Resistance Against CRISPR/Cas9 Gene Drive. *Genetics.* 2017; 205: 827–841. <https://doi.org/10.1534/genetics.116.197285> PMID: [27941126](https://pubmed.ncbi.nlm.nih.gov/27941126/)
126. Sawyer S, Hartl D. Distribution of transposable elements in prokaryotes. *Theor Popul Biol.* 1986; 30: 1–16. PMID: [3018953](https://pubmed.ncbi.nlm.nih.gov/3018953/)
127. Brookfield JFY, Badge RM. Population genetics models of transposable elements. *Evolution and Impact of Transposable Elements.* *Genetica.* 1997; 10: 281–294.
128. Charlesworth B, Charlesworth D. The population dynamics of transposable elements. *Genet Res.* 1983; 42: 1–27.
129. Lu J, Clark AG. Population dynamics of PIWI-interacting RNAs (piRNAs) and their targets in *Drosophila*. *Genome Res.* 2010; 20: 212–227. <https://doi.org/10.1101/gr.095406.109> PMID: [19948818](https://pubmed.ncbi.nlm.nih.gov/19948818/)
